# Supplementary material for: Discrimination of Classical and Atypical BSE by a Distinct Immunohistochemical PrPSc Profile
Source: MDPI journal article supplement (doi:10.3390/pathogens12020353), 2023-02-20
Supplement: s1 [file s1]

**Table S1:** Lesion profiles in different brain regions of C-, H- and L-type BSE infected cattle (literature review)

| BSE            | Brainstem                                                                                                                                                                                                                                                                                                                                                                                                                       | Cerebellum                                                                                              | Midbrain                                                                                                                                                                                                                                                                      | Diencephalon and Cerebrum*                                                                                                                                                                                                                                                    | Others brain regions                                                                                                                                                                                                                                                                                                   | Remarks                                                                                                                                                                                                                                                          |
|----------------|---------------------------------------------------------------------------------------------------------------------------------------------------------------------------------------------------------------------------------------------------------------------------------------------------------------------------------------------------------------------------------------------------------------------------------|---------------------------------------------------------------------------------------------------------|-------------------------------------------------------------------------------------------------------------------------------------------------------------------------------------------------------------------------------------------------------------------------------|-------------------------------------------------------------------------------------------------------------------------------------------------------------------------------------------------------------------------------------------------------------------------------|------------------------------------------------------------------------------------------------------------------------------------------------------------------------------------------------------------------------------------------------------------------------------------------------------------------------|------------------------------------------------------------------------------------------------------------------------------------------------------------------------------------------------------------------------------------------------------------------|
| C-type (field) | Brainstem: ++ <sup>[43]</sup><br>DMNV: +(+) <sup>[20]</sup> ; +++ <sup>[40,44,3]</sup><br>Nc. Sol. Trac., Nc. Trigem: +++ <sup>[11,16,18,19,17,20,40,44]</sup><br>Nc. Hyp.: (+) <sup>[16,18,19]</sup> ; + <sup>[20]</sup><br>Nc. Coch.: (+) <sup>[16,18,19]</sup><br>Vest. Compl.: + <sup>[16,18,19,20,40]</sup> ; ++ <sup>[17]</sup> ; +++ <sup>[3,40]</sup><br>Ret. Form, Olive: +++ <sup>[3,40]</sup> ; + <sup>[20,44]</sup> | Vermis: (+) <sup>[11,16,18,19,20,43]</sup><br>Medulla: + <sup>[43]</sup><br>Cortex: (+) <sup>[43]</sup> | Midbrain: ++ <sup>[43]</sup><br>Centr. Grey: +++ <sup>[40,11,16,17]</sup> ; +(+) <sup>[19]</sup><br>Rostr. Coll: ++ <sup>[16,18,19]</sup><br>Med. Gen. Nc: + <sup>[16,18,19]</sup><br>Nc. Ruber: +++ <sup>[3]</sup> ; + <sup>[20]</sup><br>Subst. Nigra: +(+) <sup>[20]</sup> | Tha.: + <sup>[41,16,18,19]</sup> ; +(+) <sup>[43]</sup> ; ++ <sup>[40]</sup><br>Hyp.: ++ <sup>[11,16,18,19]</sup> ; +++ <sup>[40]</sup><br>Hip.: (+) <sup>[43]</sup> ; ++ <sup>[11]</sup><br>Cortex: (+) <sup>[11,16,18,19]</sup> ; + <sup>[40,43]</sup> ; ++ <sup>[40]</sup> | CS: + <sup>[11]</sup> ; +(+) <sup>[43]</sup><br>Caud.: (+) <sup>[16,18,19]</sup> ; +++ <sup>[40]</sup><br>Put.: + <sup>[16,18,19]</sup> ; +++ <sup>[40]</sup><br>Sept.: (+) <sup>[16,18,19]</sup> ; + <sup>[11]</sup><br>Claustr.: Negative <sup>[16,18,19]</sup><br>OB: (+) <sup>[43]</sup><br>LoP: + <sup>[43]</sup> | Preclinical animals with mild lesions in Nc. Sol. Trac., Nc. Trigem., DMNV, Ret. Form. <sup>[41]</sup><br>Vest. Compl. affected in early disease <sup>[54]</sup><br>Two cows with a different lesion profile (Vermis, Tha, Cortex: B>A; MB: A>B) <sup>[40]</sup> |
| C-type (IC)    | Nc. Sol. Trac., Nc. Trigem: +++ <sup>[28]</sup><br>Nc. Hyp.: (+) <sup>[28]</sup><br>Nc. Coch, Vest. Compl.: ++ <sup>[28]</sup>                                                                                                                                                                                                                                                                                                  | Vermis: (+) <sup>[28]</sup>                                                                             | Centr. Grey, Rostr. Coll., Med. Gen. Nc.: +++ <sup>[28]</sup>                                                                                                                                                                                                                 | Tha., Hyp.: +++ <sup>[28]</sup><br>Cortex: (+) <sup>[28]</sup>                                                                                                                                                                                                                | Caud.: + <sup>[28]</sup><br>Put: +++ <sup>[28]</sup><br>Sept.: (+) <sup>[28]</sup><br>Claustr.: (+) <sup>[28]</sup>                                                                                                                                                                                                    | Lesion profile comparable to natural infected BSE cases <sup>[28]</sup>                                                                                                                                                                                          |
| H-type (field) | Brainstem: + <sup>[23]</sup><br>Nc. Sol. Trac., Nc. Trigem: +++ <sup>[21]</sup> ; + <sup>[22]</sup><br>DMNV: less severe <sup>[21]</sup><br>Olive: +++ <sup>[21]</sup>                                                                                                                                                                                                                                                          | NA                                                                                                      | Midbrian: + <sup>[23]</sup>                                                                                                                                                                                                                                                   | NA                                                                                                                                                                                                                                                                            | NA                                                                                                                                                                                                                                                                                                                     | No amyloid in brainstem <sup>[22]</sup>                                                                                                                                                                                                                          |
| H-type (IC)    | Brainstem: ++(+) <sup>[27]</sup><br>Nc. Sol. Trac., Nc. Trigem: +++ <sup>[26]</sup><br>Nc. Hyp.: + <sup>[26]</sup><br>Nc. Coch, Vest. Compl.: ++ <sup>[26]</sup>                                                                                                                                                                                                                                                                | Vermis: ++ <sup>[26]</sup> ; ++(+) <sup>[27]</sup>                                                      | Centr. Grey, Rostr. Coll.: +++ <sup>[26]</sup><br>Med. Gen. Nc.: ++(+) <sup>[26]</sup>                                                                                                                                                                                        | Tha.: ++(+) <sup>[27]</sup> ; +++ <sup>[26]</sup><br>Hyp.: +++ <sup>[26]</sup><br>Hip.: +++ <sup>[27]</sup><br>Cortex: ++ <sup>[25,26,30,31,29]</sup> ; ++(+) <sup>[27]</sup>                                                                                                 | Caud.: ++ <sup>[26]</sup><br>Put.: ++ <sup>[26]</sup><br>Sept.: (+) <sup>[26]</sup><br>Claustr.: + <sup>[26]</sup><br>BG: ++(+) <sup>[27]</sup><br>LoP: +++ <sup>[27]</sup>                                                                                                                                            | Brainstem with mildest lesions in pons and Nc. Hyp. <sup>[27]</sup><br>C-Type with no lesion in Vermis <sup>[26]</sup> , with less lesions in Cortex <sup>[30,31,26]</sup> , Caud. and Put <sup>[26]</sup> , but more lesions in Sept. <sup>[26]</sup>           |

|                   |                                                                                                                                                        |                                                            |                                                                       |                                                                                                                |                                                                                                                      |                                                               |
|-------------------|--------------------------------------------------------------------------------------------------------------------------------------------------------|------------------------------------------------------------|-----------------------------------------------------------------------|----------------------------------------------------------------------------------------------------------------|----------------------------------------------------------------------------------------------------------------------|---------------------------------------------------------------|
| L-type<br>(field) | NA                                                                                                                                                     | NA                                                         | NA                                                                    | <i>Tha.</i> : + <sup>[7]</sup><br><i>Hip., Cortex</i> : negative <sup>[7]</sup>                                | NA                                                                                                                   | Brainstem lesions are not<br>consistently seen <sup>[7]</sup> |
|                   | <i>Nc. Sol. Trac., Nc. Trigem.</i> :<br>+++ <sup>[24,25,29]</sup>                                                                                      | <i>Vermis</i> : (+) <sup>[24]</sup> ; + <sup>[25,29]</sup> | <i>Centr. Grey, Rostr. Coll.</i> :<br>+++ <sup>[25,24,29]</sup>       | <i>Tha., Hyp</i> : ++ <sup>[24,25,29]</sup><br><i>Cortex</i> : (+) <sup>[6]</sup> ; ++ <sup>[5,10,11,14]</sup> | <i>Caud.</i> : (+) <sup>[24]</sup> + <sup>[25,29]</sup><br><i>Put.</i> : (+) <sup>[24]</sup> ; ++ <sup>[25,29]</sup> | C-type with less lesions in<br>Cortex <sup>[30,31]</sup>      |
| L-type<br>(IC)    | <i>Nc. Hyp.</i> : Negative <sup>[24]</sup> ;<br>(+) <sup>[25,29]</sup><br><i>Nc. Coch. Vest. Compl.</i> :<br>(+) <sup>[24]</sup> ++ <sup>[25,29]</sup> |                                                            | <i>Med. Gen. Nc.</i> : ++ <sup>[24]</sup> ;<br>+++ <sup>[25,29]</sup> |                                                                                                                | <i>Sept., Claustr.</i> : (+) <sup>[24]</sup> ;<br>+ <sup>[25,29]</sup>                                               | C-type with distinctly<br>more lesion in Put. <sup>[24]</sup> |
| L-type<br>(oral)  | <i>Brainstem</i> : + <sup>[47]</sup><br><i>DMNV</i> : negative <sup>[47]</sup>                                                                         | <i>Cortex</i> : negative <sup>[47]</sup>                   | NA                                                                    | <i>Tha.</i> : + <sup>[47]</sup><br><i>Cortex</i> : negative <sup>[47]</sup>                                    | <i>OB</i> : negative <sup>[47]</sup>                                                                                 | NA                                                            |

**Legend:** Nc./Ncc. = nucleus/nuclei; DMNV = Dorsal motor nucleus of the vagus nerve; Nc. Sol. Trac. = Nucleus of the solitary tract; Nc. Trigem. = Nucleus of the spinal tract of V; Nc. Hyp. = Nucleus hypoglossus; Nc. Coch. = Nc. cochlearis; Vest. Compl. = Vestibular nuclear complex; Nc. Cun = Nucleus cuneatus; Olive = olivary nuclei; Ret. Form.: reticular formation; Centr. Grey = Central Grey matter; Rostr. Coll. = Rostral Colliculus; Med. Gen. Nc. = Medial geniculate nucleus; Tha. = Thalamus; Hyp. = Hypothalamus; Hip. = Hippocampus; BG = Basal ganglia; CS = Corpus striatum; Caud. = Nc. caudatus; Put = Putamen; Sept. = Septal nuclei; Claustr. = Claustrum; OB = Olfactory bulb; LoP = Lobus piriformis; (+) = weak, + = mild, ++ = moderate, +++ = severe lesions; NA = not available; \*Frontal Cortex<sup>[11,16,18,19,24,25,28,29,30,31,43]</sup>, or cerebral Cortex<sup>[7,27,40,47]</sup>; references are to the main text.

**Table S2:** PrP<sup>Sc</sup> profiles in brainstem described in literature for C-, H- and L-type BSE infected cattle (literature review)

| BSE            | Brainstem                                                                                                                                                                                                                                                                                                                                                                           |                                                                                                                                                                                                                                                                                                                                                                       |                                                                                                                                                                                           |                                                                                                                                                                                                                                                     |                                                                                                                                                                                                                                                                                                                                                       |                                                                                                                                                                                                                                                                                          | Others/Remarks                                                                                                                                                                                                                                                                          |
|----------------|-------------------------------------------------------------------------------------------------------------------------------------------------------------------------------------------------------------------------------------------------------------------------------------------------------------------------------------------------------------------------------------|-----------------------------------------------------------------------------------------------------------------------------------------------------------------------------------------------------------------------------------------------------------------------------------------------------------------------------------------------------------------------|-------------------------------------------------------------------------------------------------------------------------------------------------------------------------------------------|-----------------------------------------------------------------------------------------------------------------------------------------------------------------------------------------------------------------------------------------------------|-------------------------------------------------------------------------------------------------------------------------------------------------------------------------------------------------------------------------------------------------------------------------------------------------------------------------------------------------------|------------------------------------------------------------------------------------------------------------------------------------------------------------------------------------------------------------------------------------------------------------------------------------------|-----------------------------------------------------------------------------------------------------------------------------------------------------------------------------------------------------------------------------------------------------------------------------------------|
|                | DMNV                                                                                                                                                                                                                                                                                                                                                                                | Nc. Sol. Trac.                                                                                                                                                                                                                                                                                                                                                        | Nc. Trigem.                                                                                                                                                                               | Olive                                                                                                                                                                                                                                               | Ret. Form                                                                                                                                                                                                                                                                                                                                             | Brainstem in general                                                                                                                                                                                                                                                                     |                                                                                                                                                                                                                                                                                         |
| C-type (field) | PrP <sup>Sc</sup> : +++ <sup>[45]</sup><br>PART <sup>[40,42]</sup> ,<br>F-C-PART+++ <sup>[44]</sup> ,<br>C-PART-CoL <sup>[45]</sup> ,<br>CoL+ <sup>[44]</sup><br>ITMG <sup>[42,45]</sup> + <sup>[44]</sup> ,<br>STEL++ <sup>[44]</sup><br>ITNR <sup>[40]</sup> + <sup>[44]</sup> , less<br>ITNR <sup>[45]</sup><br>PNER <sup>[40]</sup> + <sup>[44]</sup> ,<br>LIN+ <sup>[44]</sup> | PrP <sup>Sc</sup> : +++ <sup>[45]</sup><br>PART <sup>[40,42,19]</sup> ,<br>Agg. <sup>[19]</sup> ,<br>F-C-PART+++ <sup>[44]</sup> ,<br>C-PART-CoL <sup>[45]</sup> ,<br>CoL+ <sup>[44]</sup> ,<br>ITMG <sup>[45,19]</sup> + <sup>[44]</sup> ,<br>STEL++ <sup>[44]</sup><br>ITNR <sup>[45,19]</sup> + <sup>[44]</sup> ,<br>PNER+ <sup>[44]</sup><br>LIN+ <sup>[44]</sup> | PrP <sup>Sc</sup> : +++ <sup>[45]</sup><br>PART <sup>[40,42,19]</sup> ,<br>C-PART-CoL <sup>[45]</sup> ,<br>ITMG <sup>[19,45]</sup> ,<br>ITNR <sup>[19,45]</sup> ,<br>Agg. <sup>[19]</sup> | PrP <sup>Sc</sup> : +++ <sup>[45]</sup><br>PART+++ <sup>[44]</sup> ,<br>F-C-PART+ <sup>[44]</sup> ,<br>C-PART-CoL <sup>[45]</sup><br>ITMG <sup>[45]</sup> + <sup>[44]</sup> ,<br>ITNR <sup>[40,45]</sup> ++ <sup>[44]</sup><br>LIN+ <sup>[44]</sup> | PrP <sup>Sc</sup> : +++ <sup>[45]</sup><br>PART <sup>[42]</sup> ++ <sup>[44]</sup> ,<br>C-PART-CoL <sup>[45]</sup> ,<br>C-PART+ <sup>[44]</sup><br>CoL <sup>[42]</sup> + <sup>[44]</sup> ,<br>ITMG <sup>[45]</sup> ,<br>STEL+ <sup>[44]</sup> ,<br>ITNR <sup>[40,42,15]</sup> ,<br>PNER+ <sup>[44]</sup> ,<br>LIN <sup>[42]</sup> +++ <sup>[44]</sup> | PrP <sup>Sc</sup> : +++ <sup>[7]</sup><br>PART <sup>[7]</sup> ,<br>F-C-PART +++ <sup>[41]</sup><br>F-C-PART-CoL <sup>[43]</sup> ,<br>CoL++ <sup>[41]</sup> ,<br>STEL <sup>[7,41]</sup> ,<br>ITNR <sup>[7,43]</sup> ++ <sup>[41]</sup> ,<br>LIN <sup>[7,43]</sup><br>PNER <sup>[41]</sup> | Brainstem mostly affected <sup>[43]</sup><br><br><i>Vest. Compl.:</i><br>ITNR <sup>[19,40]</sup> , ITMG <sup>[19]</sup> ,<br>STEL <sup>[19]</sup> , PART <sup>[19]</sup> ,<br>LIN <sup>[19]</sup><br>Nc. Hyp: STELL <sup>[42]</sup> ,<br>ITNR <sup>[19,40]</sup> , PART <sup>[19]</sup> |
| C-type (IC)    | PrP <sup>Sc</sup> : + <sup>[28]</sup>                                                                                                                                                                                                                                                                                                                                               | PrP <sup>Sc</sup> : +++ <sup>[28]</sup>                                                                                                                                                                                                                                                                                                                               | PrP <sup>Sc</sup> : +++ <sup>[28]</sup>                                                                                                                                                   | NA                                                                                                                                                                                                                                                  | NA                                                                                                                                                                                                                                                                                                                                                    | PrP <sup>Sc</sup> : +++ <sup>[28]</sup><br>PART, STEL,<br>ITNR <sup>[24]</sup>                                                                                                                                                                                                           | NA                                                                                                                                                                                                                                                                                      |
| H-type (field) | PrP <sup>Sc</sup> : + <sup>[23]</sup>                                                                                                                                                                                                                                                                                                                                               | PrP <sup>Sc</sup> : ++(+) <sup>[22]</sup> or<br>+ <sup>[23]</sup><br>F-PART <sup>[22]</sup> ,<br>PNER <sup>[22]</sup> ,<br>LIN <sup>[22]</sup>                                                                                                                                                                                                                        | PrP <sup>Sc</sup> : +++ <sup>[22]</sup> or + <sup>[23]</sup><br>F-PART <sup>[22]</sup> ,<br>PNER <sup>[22]</sup> ,<br>LIN <sup>[22]</sup>                                                 | PrP <sup>Sc</sup> : + <sup>[23]</sup><br>ITNR <sup>[22]</sup>                                                                                                                                                                                       | ITNR <sup>[22]</sup>                                                                                                                                                                                                                                                                                                                                  | F-C-PART <sup>[22,23]</sup> ,<br>Agg. <sup>[8]</sup> ,<br>ITNR/ITMG <sup>[8,23]</sup> ,<br>selected Ncc.:<br>ITNR <sup>[22]</sup> , PNER+ <sup>[22]</sup><br>LIN(+) <sup>[22]</sup>                                                                                                      | <i>Nc. Cun.:</i><br>ITNR <sup>[22]</sup> + <sup>[23]</sup><br><i>Nc. Hyp:</i><br>PrP <sup>Sc</sup> + <sup>[23]</sup>                                                                                                                                                                    |
| H-type (IC)    | No ITNR <sup>[27]</sup><br>ITMG <sup>[61]</sup>                                                                                                                                                                                                                                                                                                                                     | ITMG <sup>[61]</sup>                                                                                                                                                                                                                                                                                                                                                  | ITMG <sup>[61]</sup>                                                                                                                                                                      | NA                                                                                                                                                                                                                                                  | NA                                                                                                                                                                                                                                                                                                                                                    | PrP <sup>Sc</sup> : +++ <sup>[27,30,26]</sup><br>F-C-PART <sup>[31,26]</sup> ,<br>CoL <sup>[27]</sup> ,<br>ITMG <sup>[8,10,61]</sup> ,<br>ITNR <sup>[26,27]</sup> ,<br>PNER <sup>[26]</sup> ,<br>LIN <sup>[26]</sup>                                                                     | Distinct<br>ITMG/STEL <sup>[31]</sup> or<br>ITMG <sup>[61]</sup><br><br>WM: ITMG <sup>[26]</sup><br><br>No ITNR with<br>SAF32 and B103<br>(N-terminal) <sup>[26]</sup>                                                                                                                  |

|                   |                                                                                                 |                      |                                                                      |    |                      |                                                                                                                                                               |                                                                                                                             |
|-------------------|-------------------------------------------------------------------------------------------------|----------------------|----------------------------------------------------------------------|----|----------------------|---------------------------------------------------------------------------------------------------------------------------------------------------------------|-----------------------------------------------------------------------------------------------------------------------------|
| L-type<br>(field) | <i>PrP<sup>Sc</sup></i> : (+) <sup>[8]</sup><br>Negative <sup>[7]</sup><br>Agg. <sup>[42]</sup> | Agg. <sup>[42]</sup> | <i>PrP<sup>Sc</sup></i> : (+) <sup>[8]</sup><br>Agg. <sup>[42]</sup> | NA | Agg. <sup>[42]</sup> | <i>PrP<sup>Sc</sup></i> : (+) <sup>[7]</sup><br>No PL <sup>[46]</sup>                                                                                         | ITNR/ExNTR <sup>[8]</sup><br>Similar to C-<br>Type <sup>[46]</sup> ,<br>consistent <sup>[30]</sup> with<br>[46] (L-type IC) |
| L-type<br>(IC)    | ITNR <sup>[61]</sup>                                                                            | ITNR <sup>[61]</sup> | ITNR <sup>[61]</sup>                                                 | NA | NA                   | <i>PrP<sup>Sc</sup></i> : +++ <sup>[29,30]</sup><br>F-C-PART <sup>[29,30]</sup> ,<br>CoL <sup>[30]</sup><br>ITNR <sup>[14,61]</sup> ,<br>PNER <sup>[12]</sup> | Similar to C-Type <sup>[25]</sup><br>PNER prominent <sup>[31]</sup>                                                         |
| L-type<br>(oral)  | <i>PrP<sup>Sc</sup></i> : ++ <sup>[47]</sup>                                                    | NA                   | NA                                                                   | NA | NA                   | <i>PrP<sup>Sc</sup></i> : +++ <sup>[47]</sup><br>F-C-PART <sup>[47]</sup> ,<br><i>Nc. Cun</i> : PNER <sup>[47]</sup>                                          | No PL <sup>[47]</sup>                                                                                                       |

**Legend:** DMNV = Dorsal motor nucleus of the vagus nerve; Nc. Sol. Trac. = Nucleus of the solitary tract; Nc. Trigem. = Nucleus of the spinal tract of V; Nc. Hyp. = Nucleus hypoglossus; Vest. Compl. = Vestibular nuclear complex; Nc. Cun = Nucleus cuneatus; Olive = olivary nuclei; Ret. Form.: reticular formation; Nc./Ncc. = nucleus/nuclei; PrP<sup>Sc</sup> = quantity of PrP<sup>Sc</sup>; (+) = weak, + = mild, ++ = moderate, +++ = severe accumulation of PrP<sup>Sc</sup>; PART = PrP<sup>Sc</sup> deposition on cell surface in different appearance: F-G-PART-CoL = fine (F) and/or coarse (C) PART accumulation up to a coalescing (CoL) pattern; ITMG = intramicroglial; STEL = stellate; ITNR = intraneuronal; PNER = perineuronal; LIN = linear; Agg. = aggregates; PL = plaques; NA = not available; anti-PrP antibodies used recognize the core region of the protein: F99<sup>[7,8,22,23,24,26,27,29,42,47]</sup>; R145<sup>[19,30,31,46]</sup>; 6H4<sup>[25,41,43]</sup>; T1<sup>[28,45]</sup>; 12F10<sup>[8]</sup>; C15S<sup>[44]</sup>; L42<sup>[43]</sup>; SAF84<sup>[40]</sup>; F99/6C2<sup>[61]</sup>; references are to the main text.

**Table S3:** PrP<sup>Sc</sup> profiles in different brain regions described in literature for C-, H- and L-type BSE infected cattle (literature review)

| BSE            | Cerebellum                                                                                                                                                                                                                                                                                                                                                                                                                                      | Midbrain                                                                                                                                                                                                                                                                                                                                                                                                                                                                                                                                                     | Thalamus                                                                                                                                                                                                                                                                                                                                                                                                                                                        | Hypothalamus and Hippocampus                                                                                                                                                                                                                                                                                                                                                                                                                                                                                                                              | Cerebrum                                                                                                                                                                                                                                                                                                                                          | Other brain regions                                                                                                                                                                                                                                                                                                                                                                                                                                                                                                                                                                                                                         | Remarks                                                                                                                |
|----------------|-------------------------------------------------------------------------------------------------------------------------------------------------------------------------------------------------------------------------------------------------------------------------------------------------------------------------------------------------------------------------------------------------------------------------------------------------|--------------------------------------------------------------------------------------------------------------------------------------------------------------------------------------------------------------------------------------------------------------------------------------------------------------------------------------------------------------------------------------------------------------------------------------------------------------------------------------------------------------------------------------------------------------|-----------------------------------------------------------------------------------------------------------------------------------------------------------------------------------------------------------------------------------------------------------------------------------------------------------------------------------------------------------------------------------------------------------------------------------------------------------------|-----------------------------------------------------------------------------------------------------------------------------------------------------------------------------------------------------------------------------------------------------------------------------------------------------------------------------------------------------------------------------------------------------------------------------------------------------------------------------------------------------------------------------------------------------------|---------------------------------------------------------------------------------------------------------------------------------------------------------------------------------------------------------------------------------------------------------------------------------------------------------------------------------------------------|---------------------------------------------------------------------------------------------------------------------------------------------------------------------------------------------------------------------------------------------------------------------------------------------------------------------------------------------------------------------------------------------------------------------------------------------------------------------------------------------------------------------------------------------------------------------------------------------------------------------------------------------|------------------------------------------------------------------------------------------------------------------------|
| C-type (field) | <i>Cortex:</i> F-C-PART <sup>[41]</sup> ; ITNR <sup>(+)</sup> <sup>[41]</sup> ; PNER <sup>[41,43]</sup> ; STEL <sup>++</sup> <sup>[41,43]</sup><br><i>MLay:</i> STEL <sup>++</sup> <sup>[45]</sup><br><i>Medulla:</i> PrP <sup>Sc</sup> <sup>++</sup> <sup>[45]</sup> , F-C-PART <sup>[43,45]</sup> ; ITNR <sup>[43,45]</sup> ; STEL <sup>[43]</sup> ; LIN <sup>[43,45]</sup><br><i>Vermis:</i> STEL <sup>[43]</sup> ; F-C-PART <sup>[43]</sup> | <i>PrP<sup>Sc</sup>:</i> <sup>+++</sup> <sup>[25,45]</sup><br>PART <sup>[25]</sup> , F-C-PART-CoL <sup>[43,45]</sup> , PART-CoL <sup>++</sup> <sup>[41]</sup> , STEL <sup>[43]</sup> <sup>++</sup> <sup>[41]</sup> , ITNR <sup>[41,43,45]</sup> (Red Nc. <sup>40</sup> )<br>PNER <sup>[41,43]</sup> , LIN <sup>[41,43]</sup> , PL <sup>[25]</sup><br><i>Subst. nigra:</i> PART <sup>[40]</sup><br><i>Centr. Grey:</i> PL <sup>[40]</sup> (not in <sup>[19]</sup> ), ITNR <sup>[19]</sup> , STEL <sup>[19]</sup> , PART <sup>[19]</sup> , Agg <sup>[19]</sup> | <i>PrP<sup>Sc</sup>:</i> <sup>+++</sup> <sup>[7,45]</sup><br>PART <sup>[7,19,40,43]</sup> , F-C-PART-CoL <sup>[43,45]</sup> , PART-CoL <sup>++</sup> <sup>[41]</sup> , STEL <sup>[7,19,43,45]</sup> , <sup>+</sup> <sup>[41]</sup> , ITNR <sup>[7,19,40,43,45]</sup> <sup>++</sup> <sup>[41]</sup> , PNER <sup>[45]</sup> <sup>++</sup> <sup>[41]</sup> , LIN <sup>[7,19,43,45]</sup> <sup>++</sup> <sup>[41]</sup> , PL <sup>[40]</sup> , Agg. <sup>[19]</sup> | <i>Hyp:</i> PrP <sup>Sc</sup> <sup>+++</sup> <sup>[45]</sup><br>ITNR <sup>[19,40,45]</sup> , F-C-PART-CoL <sup>[45]</sup> , Agg. <sup>[19]</sup> , STEL <sup>[19,45]</sup><br>PNER <sup>[19,45]</sup> <sup>++</sup> <sup>[41]</sup> , LIN <sup>[19,45]</sup><br><i>Hip:</i> PrP <sup>Sc</sup> <sup>++</sup> <sup>[45]</sup><br>F-C-PART in GLay <sup>[45]</sup> , STEL <sup>[41,43]</sup> in Str. Oriens / MLay <sup>[45]</sup> , ITNR <sup>[41]</sup> in Str. Pyr. <sup>[45]</sup> , PNER <sup>[41,43]</sup> , LIN in Str. Oriens / MLay <sup>[45]</sup> | <i>Cortex:</i> PrP <sup>Sc</sup> <sup>+</sup> <sup>[7,45]</sup><br>PART <sup>[2]</sup> , <sup>(+)</sup> <sup>[19,41]</sup> , F-PART <sup>[45]</sup><br>STEL <sup>[7,19,45]</sup> <sup>++</sup> <sup>[41]</sup> , ITNR <sup>[7,45]</sup> <sup>(+)</sup> <sup>[19]</sup><br>PNER <sup>[40]</sup> , LIN <sup>[7,19,41,45]</sup> , PL <sup>[40]</sup> | <i>CS:</i> F-C-PART <sup>[45]</sup> <sup>+</sup> <sup>[41]</sup> , CoL <sup>[41]</sup> , STEL <sup>[41,45]</sup> , ITNR <sup>[45]</sup> , LIN <sup>[41,45]</sup><br><i>OB<sup>[7]</sup>, LoP<sup>[7]</sup>:</i> PrP <sup>Sc</sup> <sup>+</sup><br>PART, STEL, ITNR, LIN<br><i>Caud-Put:</i> ITNR <sup>[19]</sup> , STEL <sup>[19]</sup> , PNER <sup>[19,40]</sup> , LIN <sup>[19]</sup> , Agg <sup>[19]</sup><br><i>Sept.:</i> ITNR <sup>[19]</sup> , STEL <sup>[19]</sup> , PART <sup>[19]</sup> , LIN <sup>[19]</sup> , <sup>(+)</sup> PNER <sup>[19]</sup> , <sup>(+)</sup> Agg <sup>[19]</sup><br><i>Claustr.:</i> STEL <sup>[19]</sup> | Cerebral Cortex the least affected <sup>[43]</sup>                                                                     |
| C-type (IC)    | WM: PrP <sup>Sc</sup> <sup>+++</sup> <sup>[28]</sup><br>GLay: <sup>+</sup> <sup>(+)</sup> <sup>[28]</sup><br><i>In general:</i> PART <sup>[24]</sup> , STEL <sup>[24]</sup> , ITNR <sup>[24]</sup>                                                                                                                                                                                                                                              | NA                                                                                                                                                                                                                                                                                                                                                                                                                                                                                                                                                           | <i>PrP<sup>Sc</sup>:</i> <sup>+++</sup> <sup>[28]</sup><br>PART <sup>[24]</sup> , STEL <sup>[24]</sup> , ITNR <sup>[24]</sup>                                                                                                                                                                                                                                                                                                                                   | NA                                                                                                                                                                                                                                                                                                                                                                                                                                                                                                                                                        | <i>Cortex:</i> PrP <sup>Sc</sup> <sup>+</sup> <sup>(+)</sup> <sup>[28]</sup><br>PART <sup>[24]</sup> , STEL <sup>[24]</sup> , ITNR <sup>[24]</sup>                                                                                                                                                                                                | <i>OB<sup>[24]</sup>, BG<sup>[24]</sup>:</i> PART, STEL                                                                                                                                                                                                                                                                                                                                                                                                                                                                                                                                                                                     | NA                                                                                                                     |
| H-type (field) | <i>PrP<sup>Sc</sup>:</i> negative <sup>[23]</sup>                                                                                                                                                                                                                                                                                                                                                                                               | <i>PrP<sup>Sc</sup>:</i> <sup>+</sup> <sup>[23]</sup><br>PART, ITNR, ITMG <sup>[23]</sup>                                                                                                                                                                                                                                                                                                                                                                                                                                                                    | <i>PrP<sup>Sc</sup>:</i> <sup>+</sup> <sup>[23]</sup><br>PART, ITNR, ITMG <sup>[23]</sup>                                                                                                                                                                                                                                                                                                                                                                       | <i>Hip:</i> PrP <sup>Sc</sup> negative <sup>[23]</sup>                                                                                                                                                                                                                                                                                                                                                                                                                                                                                                    | <i>Cortex:</i> PrP <sup>Sc</sup> negative <sup>[23]</sup>                                                                                                                                                                                                                                                                                         | <i>BG:</i> PrP <sup>Sc</sup> negative <sup>[23]</sup>                                                                                                                                                                                                                                                                                                                                                                                                                                                                                                                                                                                       | NA                                                                                                                     |
| H-type (IC)    | <i>Cortex:</i> STEL <sup>[26]</sup><br><i>M/Lay:</i> PrP <sup>Sc</sup> <sup>(+)</sup> <sup>[27]</sup> or <sup>+</sup> <sup>[30]</sup> , PART <sup>[27]</sup> , multifocal <sup>[30]</sup>                                                                                                                                                                                                                                                       | <i>PrP<sup>Sc</sup>:</i> PrP <sup>Sc</sup> <sup>+++</sup> <sup>[27]</sup><br>F-C-PART <sup>[26]</sup> , ITMG <sup>[27]</sup> in WM <sup>[26]</sup> , ITNR <sup>[27]</sup> in different Ncc.                                                                                                                                                                                                                                                                                                                                                                  | F-C-PART <sup>[26]</sup> , STEL <sup>[26]</sup><br>ITNR <sup>[26]</sup> , LIN <sup>[26]</sup> , PNER <sup>[26]</sup>                                                                                                                                                                                                                                                                                                                                            | <i>Hyp:</i> PrP <sup>Sc</sup> <sup>+++</sup> <sup>[26]</sup><br>F-C-PART <sup>[26]</sup> , STEL <sup>[26]</sup><br><i>Hip:</i> PrP <sup>Sc</sup> <sup>++</sup> <sup>[27]</sup><br>CoL <sup>[27]</sup> , STEL <sup>[26]</sup> ,                                                                                                                                                                                                                                                                                                                            | <i>Cortex:</i> PrP <sup>Sc</sup> <sup>+++</sup> <sup>[26]</sup><br>PART <sup>[30]</sup> , F-C-PART <sup>[26,27]</sup> , CoL <sup>[27]</sup> , STEL <sup>[26,27,30]</sup> , ITMG <sup>[27]</sup> , ITNR <sup>[25]</sup>                                                                                                                            | <i>BG<sup>[26]</sup>:</i> PrP <sup>Sc</sup> <sup>+++</sup><br>F-C-PART, STEL, ITNR, PNER, LIN<br><i>CS:</i> <sup>+</sup> PL <sup>[26]</sup>                                                                                                                                                                                                                                                                                                                                                                                                                                                                                                 | Extensive PART, but distinct ITMG/STEL <sup>[31]</sup><br><br>No ITNR with SAF32 and B103 (N-terminal) <sup>[26]</sup> |

|                   |                                                                                                                                                                                                                  |                                                                              |                                                                                                                                                                                                           |                                                               |                                                                                                                                                                                                                                                           |                                   |                                                                                                                                                                                                    |
|-------------------|------------------------------------------------------------------------------------------------------------------------------------------------------------------------------------------------------------------|------------------------------------------------------------------------------|-----------------------------------------------------------------------------------------------------------------------------------------------------------------------------------------------------------|---------------------------------------------------------------|-----------------------------------------------------------------------------------------------------------------------------------------------------------------------------------------------------------------------------------------------------------|-----------------------------------|----------------------------------------------------------------------------------------------------------------------------------------------------------------------------------------------------|
|                   | WM: negative <sup>[27]</sup> ,<br>STEL <sup>[30]</sup> , ITMG <sup>[26]</sup> ,<br>PL <sup>[26]</sup><br>Ncc.: PrP <sup>Sc</sup><br>positive <sup>[27]</sup><br><i>In general</i> : F-C-<br>PART <sup>[26]</sup> |                                                                              |                                                                                                                                                                                                           | WM:<br>ITMG <sup>[26]</sup> , PL <sup>+</sup> <sup>[26]</sup> | rarely <sup>[27]</sup> ,<br>PNER <sup>[26,27]</sup> , LIN <sup>[26]</sup> ,<br>PL <sup>[26]</sup><br>WM: (+) C-<br>PART <sup>[27]</sup> , ITMG <sup>[26]</sup> ,<br>PL <sup>[26]</sup> rarely <sup>[30]</sup>                                             |                                   |                                                                                                                                                                                                    |
| L-type<br>(field) | <i>MLay</i> : PrP <sup>Sc</sup> <sup>+</sup> <sup>[7]</sup><br>PL <sup>[7]</sup>                                                                                                                                 | NA                                                                           | PL <sup>[7]</sup>                                                                                                                                                                                         | NA                                                            | <i>Cortex</i> /WM: PL <sup>[7]</sup>                                                                                                                                                                                                                      | <i>OB</i> : PL <sup>[7]</sup>     | No PL <sup>[46]</sup> , pattern<br>similar to C-type <sup>[46]</sup> ,<br>consistent <sup>[30]</sup> with<br><sup>[46]</sup> (L-type IC)                                                           |
| L-type<br>(IC)    | <i>M/GLay</i> :<br>PrP <sup>Sc</sup> +++ <sup>[30]</sup> ,<br>homogenous <sup>[30]</sup><br>Ncc.: F-C-PART <sup>[29]</sup><br><i>In general</i> :<br>PNER <sup>[24]</sup>                                        | <i>Centr. Grey</i> :<br>F-C-PART <sup>[29]</sup> , PL<br>(+) <sup>[29]</sup> | <i>PrP<sup>Sc</sup></i> : +++ <sup>[25]</sup><br>PART <sup>[25]</sup> , F-C-<br>PART+++ <sup>[29]</sup><br>ITNR++ <sup>[29]</sup> ,<br>PNER <sup>[24]</sup> , PL <sup>[25]</sup> ;<br>(+) <sup>[29]</sup> | PNER <sup>[24]</sup>                                          | <b><i>Cortex</i></b> : F-C-<br>PART <sup>[29]</sup> ,<br>ITNR <sup>+</sup> <sup>[29]</sup> , PL in<br>deep grey<br>layers <sup>[24,29]</sup><br>WM: C-PART <sup>[30]</sup> ,<br>PNER <sup>[30,24]</sup> ,<br>PL <sup>[24,27,30]</sup> (+) <sup>[29]</sup> | <i>BG</i> : PL(+) <sup>[29]</sup> | Like C-type<br>topography <sup>[25]</sup><br><br>In midbrain and<br>thalamus mostly<br>periaquae-ductual<br>areas affected <sup>[25]</sup><br><br>Extensive PART,<br>distinct PNER <sup>[31]</sup> |
| L-type<br>(oral)  | NA                                                                                                                                                                                                               | NA                                                                           | <i>PrP<sup>Sc</sup></i> : +++ <sup>[47]</sup><br>F-C-PART <sup>[47]</sup> ,<br>PNER <sup>[47]</sup>                                                                                                       | NA                                                            | NA                                                                                                                                                                                                                                                        | NA                                | No PL detectable <sup>[47]</sup>                                                                                                                                                                   |

**Legend:** Nc./Ncc. = nucleus/nuclei; MLay = Molecular layer; GLay = Granular layer; WM = white matter; Subst. = Substantia; Centr. Grey = Central grey matter; Hyp. = Hypothalamus; Hip. = Hippocampus; Str. = Stratum; Pyr. = Stratum pyramidale; BG = Basal ganglia; CS = Corpus striatum; Caud.-Put. = Nc. caudatus-Putamen; Sept. = Septal nuclei; OB = Olfactory bulb; LoP = Lobus piriformis; Claustr.: Claustrum; PrP<sup>Sc</sup> = quantity of PrP<sup>Sc</sup>; (+) = weak, + = mild, ++ = moderate, +++ = severe accumulation of PrP<sup>Sc</sup>; PART = PrP<sup>Sc</sup> deposition on cell surface in different appearance: F-G-PART-CoL = fine (F) and/or coarse (C) PART accumulation up to a coalescing (CoL) pattern; ITMG = intramicroglial; STEL = stellate; ITNR = intraneuronal; PNER = perineuronal; LIN = linear; Agg. = aggregates; PL = plaques; NA = not available; anti-PrP antibodies used recognize the core region of the protein: F99<sup>[7,8,22,23,24,26,27,29,42,47]</sup>; R145<sup>[19,30,31,46]</sup>; 6H4<sup>[25,41,43]</sup>; T1<sup>[28,45]</sup>; 12F10<sup>[8]</sup>; C15S<sup>[44]</sup>; L42<sup>[43]</sup>; SAF84<sup>[40]</sup>; references are to the main text.
